# Supplementary material
Source: PubMed Central journal article supplement (PMC3184643)
Supplement: NIHMS163379-supplement-01.pdf [file NIHMS163379-supplement-01.pdf]

## Supplemental Information

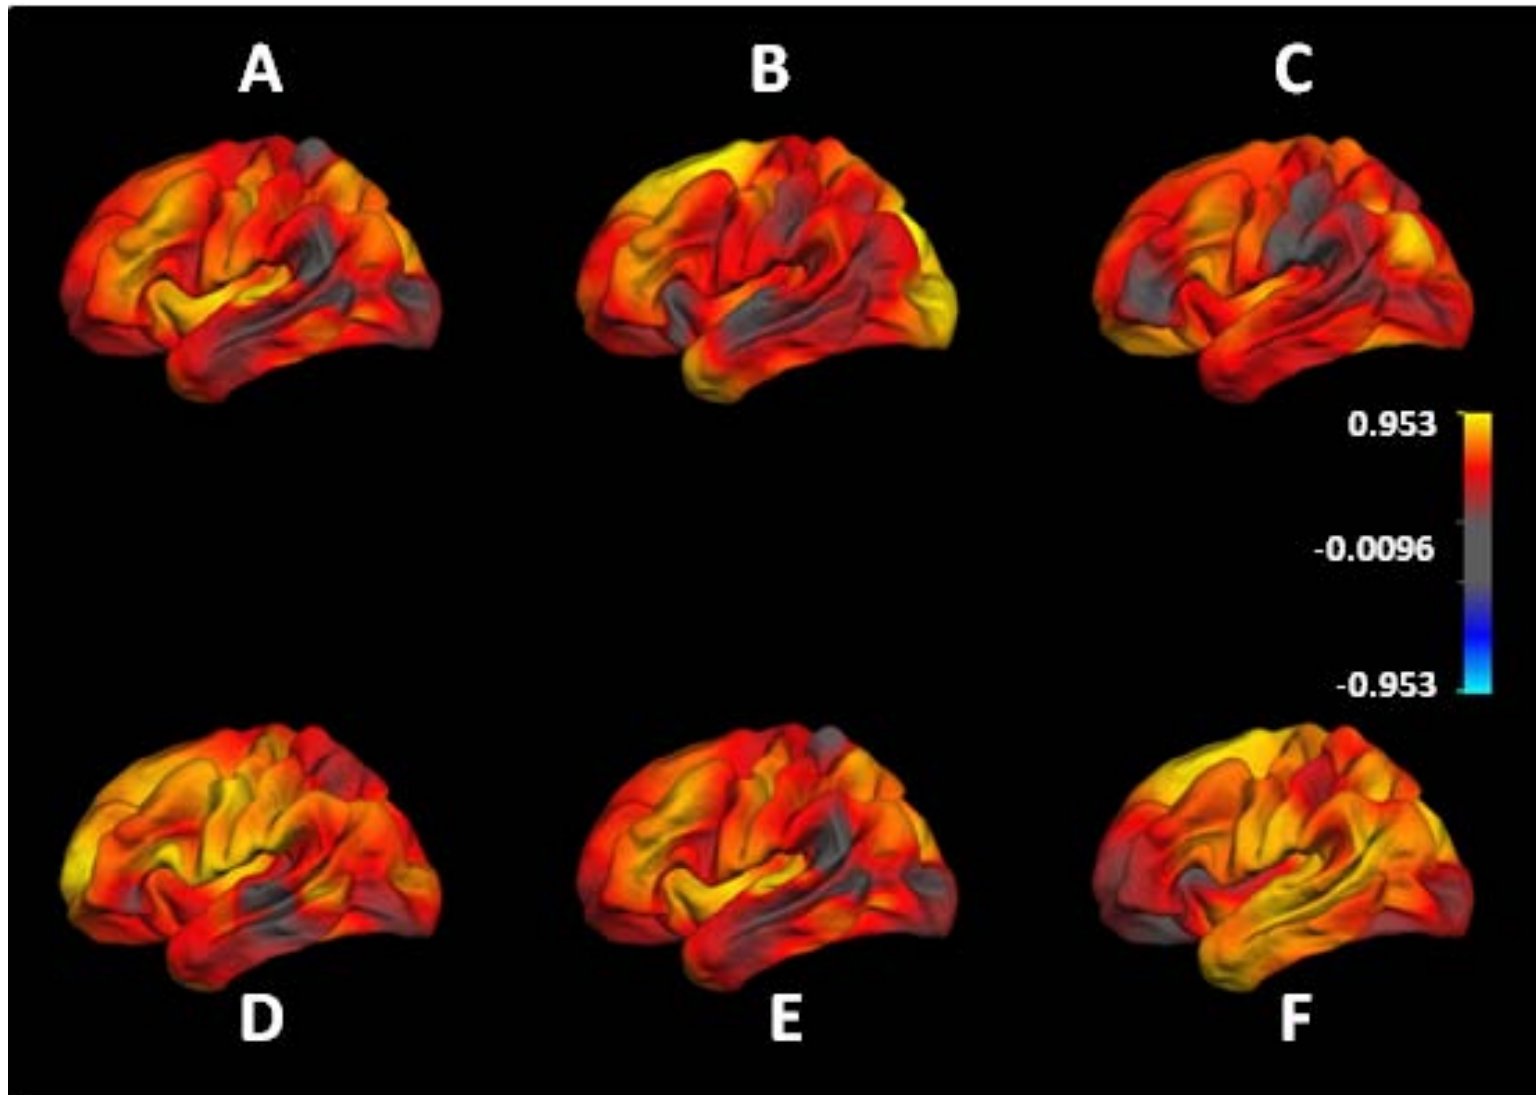

**Figure S1.** Continuous maps of heritability of cortical thickness (left hemisphere views) based on six randomly selected small subsamples, each comprising 10 MZ pairs and 10 DZ pairs. Color scale indicates heritability values. The patterns (i.e., areas of relatively high or low heritability) are not consistent across samples, thus indicating the instability of heritability estimates in samples of this size.

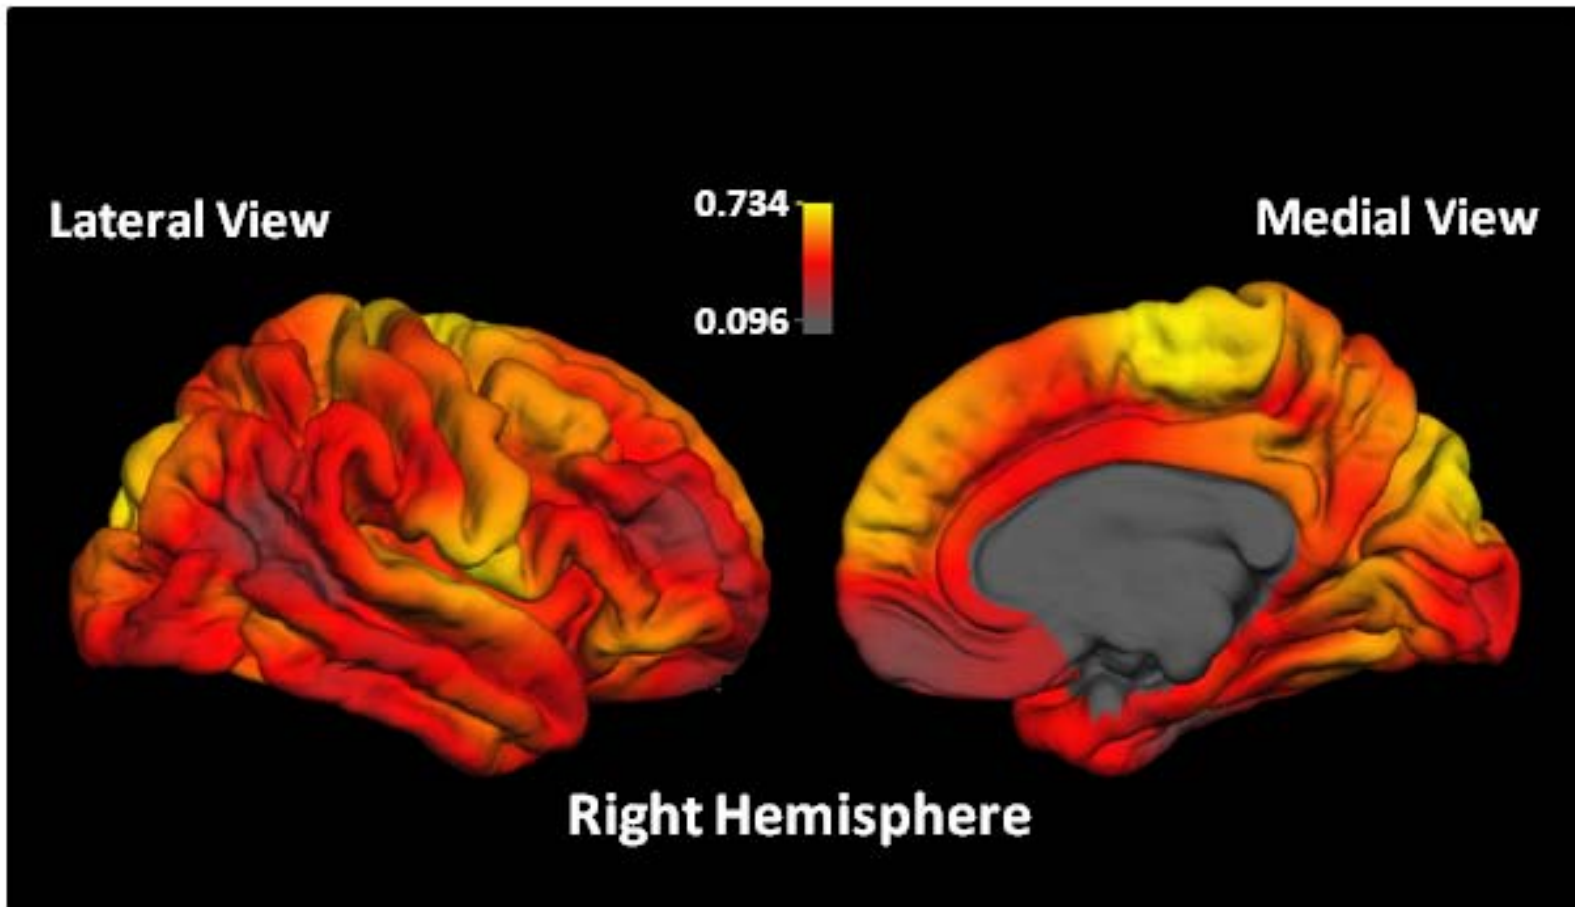

**Figure S2.** Continuous map of heritability of cortical thickness for the VETSA sample (right hemisphere views). Color scale indicates heritability values. (Corresponds to manuscript Figure 1 which shows the left hemisphere views).

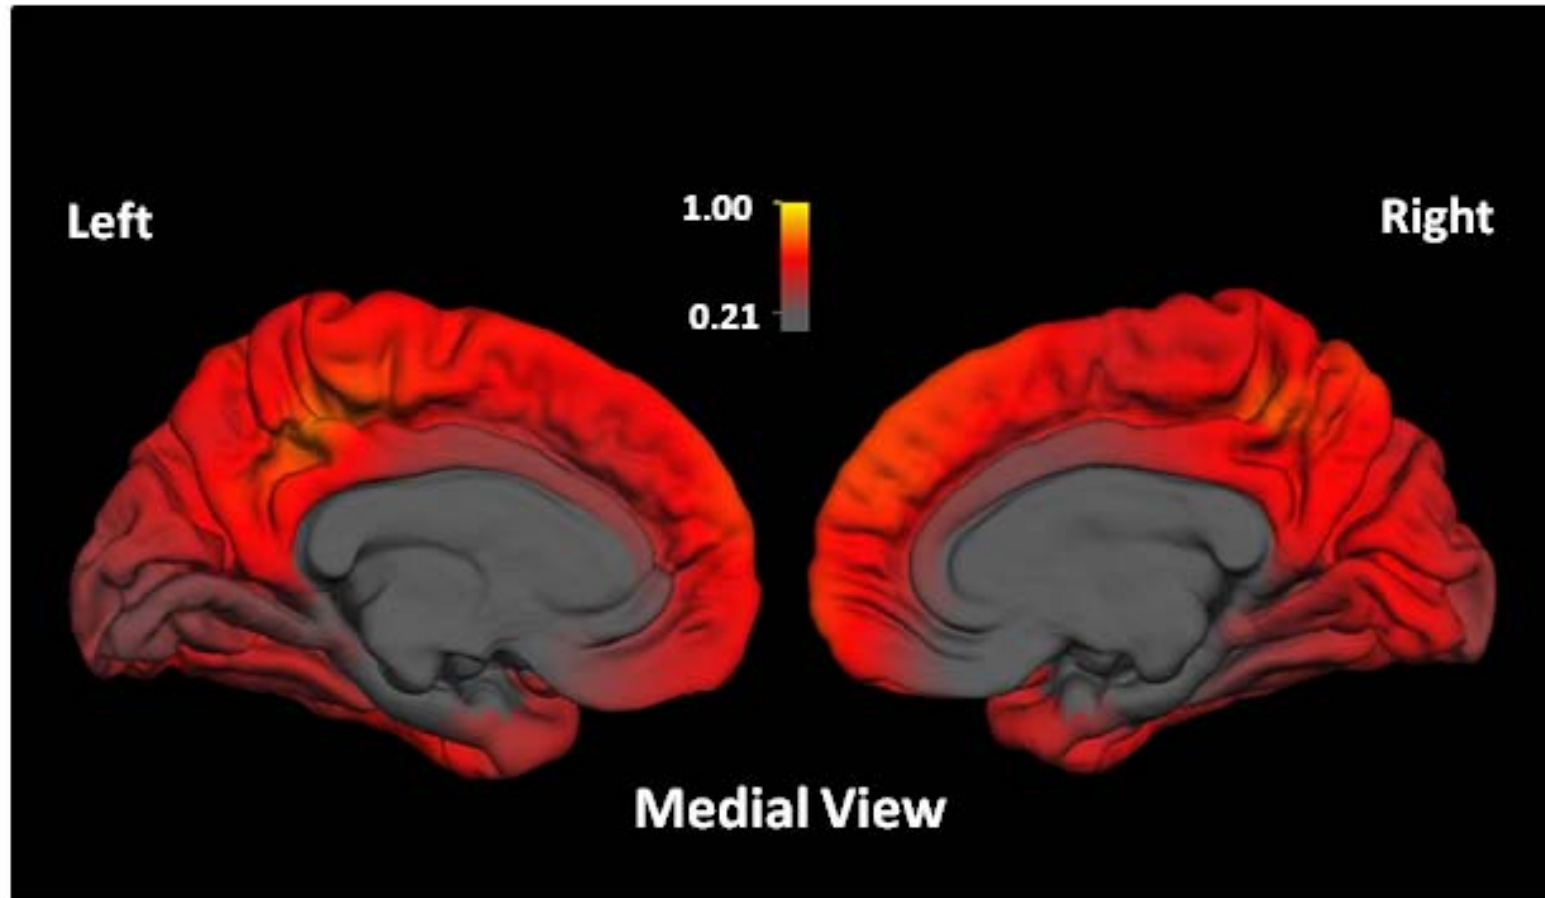

**Figure S3.** Map of genetic correlations with left middle frontal gyrus seed point for the VETSA sample (medial views). Color scale indicates strength of genetic correlations. (Corresponds to manuscript Figure 3 which shows the lateral views).
